# Supplementary material for: Efficacy of Cytoreductive Surgery (CRS) + HIPEC in Gastric Cancer with Peritoneal Metastasis: Systematic Review and Meta-Analysis
Source: MDPI journal article supplement (doi:10.3390/cancers16101929), 2024-05-18
Supplement: s1 [file s1]

| Author, Year      | N CRS + HIPEC | Neoadjuvant chemotherapy | TRIPLETE | FOLFOX | FLOT | Others |
|-------------------|---------------|--------------------------|----------|--------|------|--------|
| Yang, 2011        | 34            | NA                       | NA       | NA     | NA   | NA     |
| Yarema, 2014      | 20            | 0                        | NA       | NA     | NA   | NA     |
| Wu, 2015          | 11            | 0                        | NA       | NA     | NA   | NA     |
| H-T Wu, 2016      | 38            | 28 (56)                  | NA       | NA     | NA   | NA     |
| Boerner, 2016     | 50            | NA                       | NA       | NA     | NA   | NA     |
| Chia, 2016        | 81            | 39 (48)                  | NA       | NA     | NA   | NA     |
| Topal 2017        | 32            | 30                       | 30       | 0      | 0    | 0      |
| Caro, 2018        | 35            | 35 (100)                 | NA       | NA     | NA   | NA     |
| Kim, 2018         | 38            | 31                       | NA       | NA     | NA   | NA     |
| Manzanedo, 2019   | 88            | 84                       | NA       | NA     | 6    | 78     |
| Bonnot, 2019      | 180           | 113 (62.8)               | NA       | NA     | NA   | NA     |
| Rau, 2019         | 58            | 57 (98)                  | 13       | NA     | 35   | 9      |
| Rau, 2020         | 235           | 174 (74)                 | NA       | NA     | NA   | NA     |
| Zhong-He Ji, 2020 | 125           | 44 (35)                  | NA       | NA     | NA   | NA     |
| Rosa, 2021        | 23            | 38 (44.7)                | NA       | NA     | NA   | NA     |
| Bagdwell, 2021    | 20            | 20 (100)                 | 3        | 17     | 0    | 0      |
| Marano 2021       | 91            | 60 (65.9)                | NA       | NA     | NA   | NA     |
| Somashekhar, 2022 | 16            | 6                        | NA       | NA     | NA   | NA     |
| Santullo, 2023    | 20            | 20 (100)                 | 0        | 13     | 7    | 0      |
| Buckarma, 2023    | 22            | 22 (100)                 | NA       | NA     | NA   | NA     |
| Green, 2023       | 41            | 41 (100)                 | NA       | 23     | 10   | 8      |
| Rau, 2023         | 59            | 28                       | NA       | NA     | NA   | NA     |
| Allievi, 2023     | 27            | 23 (85.2)                | 11       | 6      | 1    | 5      |
| Kobialka, 2023    | 25            | 24 (99)                  | 14       | 0      | 10   | 0      |

**Supplementhary Matherial:** Neoadjuvant therapies and regimen were summarized.

FOLFOX: 5-Fluorouracile + Oxaliplatino; FLOT: 5-Fluorouracile + Oxaliplatino + Docetaxel; TRIPLETE: ECF (Epirubicin + Cisplatin + 5-Fluorouracile) or ECX (epirubicin, cisplatin, and capecitabine).
